# Supplementary material
Source: PubMed Central journal article supplement (PMC4185111)
Supplement: mmc1.pdf [file mmc1.pdf]

**The American Journal of Human Genetics, Volume 95**

**Supplemental Data**

## **Cryptic and Complex Chromosomal Aberrations**

### **in Early-Onset Neuropsychiatric Disorders**

**Harrison Brand, Vamsee Pillalamarri, Ryan Collins, Stacey Eggert, Colm O'Dushlaine, Ellen B. Braaten, Matthew Stone, Kimberly Chambert, Nathan D. Doty, Carrie Hanscom, Jill A. Rosenfeld, Hillary Ditmars, Jessica Blais, Ryan Mills, Charles Lee, James F. Gusella, Steven McCarroll, Jordan W. Smoller, Michael E. Talkowski, and Alysia E. Doyle**

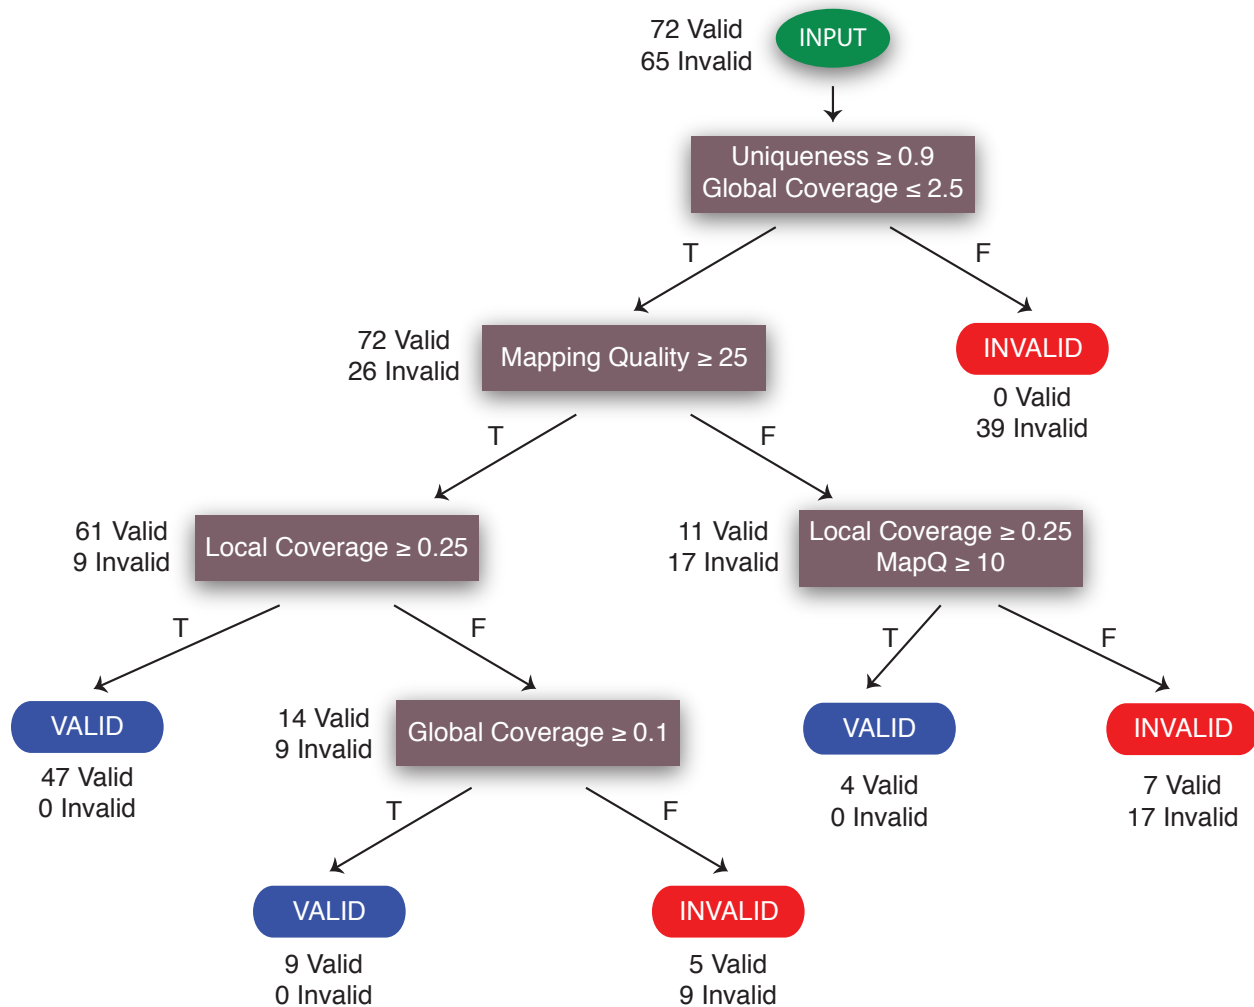

**Figure S1. Classification algorithm.** We implemented a decision tree classifier to predict high quality structural variation while mitigating false positive errors. We assessed seven metrics in each cluster as potential features for classification: 1) mapping quality, or average Phred-scaled aligner score across the reads within the cluster; 2) cluster uniqueness, or proportion of reads which mapped to unique positions; 3) local coverage, or ratio of cluster size to local insert coverage; 4) global coverage, or ratio of cluster size to the library's average haploid insert coverage; 5) span, or size of the regions spanned by the reads within the cluster, normalized by median library insert size; 6) GC content; and 7) mappability. GC content and mappability were both computed from their respective UCSC Genome Browser tracks as the average value within the regions spanned by the cluster. We compiled a set of training events ( $n=137$ ), consisting of 72 valid events confirmed by Sanger sequencing and 65 invalid events which had previously failed Sanger validation, and computed these metrics across each cluster, retaining the four most discriminatory metrics for our classifier. Each branching point in the decision tree shows the number of valid and invalid training clusters which passed the previous filter.

**Table S1. DSM –IV-TR diagnoses and other clinical features of the sample**

| <b>Subject Characteristics</b>                           | <b>Total N=29 (%)</b> |
|----------------------------------------------------------|-----------------------|
| <b>DSM-IV Diagnoses</b>                                  |                       |
| Autism Spectrum                                          |                       |
| Autistic Disorder                                        | 1 (3.5)               |
| Asperger's Syndrome                                      | 3 (10.3)              |
| Pervasive Developmental Disorder NOS                     | 7 (24.1)              |
| Subclinical features of ASD                              | 3 (10.3)              |
| Mood Disorders                                           |                       |
| Major Depressive Disorder                                | 4 (13.8)              |
| Bipolar Disorder                                         | 5 (17.2)              |
| Mood Disorder NOS                                        | 6 (20.7)              |
| Externalizing                                            |                       |
| Attention-Deficit/Hyperactivity Disorder                 | 18 (62.1)             |
| Subclinical features of ADHD                             | 3 (10.3)              |
| Anxiety Disorders                                        |                       |
| Generalized Anxiety Disorder                             | 4 (13.8)              |
| Obsessive Compulsive Disorder                            | 1 (3.5)               |
| Panic Disorder                                           | 0 (0)                 |
| Anxiety Disorder NOS                                     | 5 (17.2)              |
| Psychosis                                                |                       |
| Schizoaffective disorder                                 | 1 (3.5)               |
| Psychotic symptoms                                       | 2 (6.9)               |
| Intellectual/ Learning disorders                         |                       |
| Intellectual Disability                                  | 2 (6.9)               |
| Borderline IQ                                            | 1 (3.5)               |
| Language Disorder                                        | 1 (3.5)               |
| Math Disorder                                            | 2 (6.9)               |
| Reading Disorder                                         | 2 (6.9)               |
| <b>Numbers of full diagnoses</b>                         |                       |
| One diagnosis                                            | 6 (20.7)              |
| Two diagnoses                                            | 17 (58.6)             |
| Three diagnoses                                          | 5 (17.2)              |
| Four diagnoses                                           | 1 (3.5)               |
| <b>Past psychiatric hospitalization</b>                  |                       |
|                                                          | 11 (44.0)             |
| <b>Categories of illness</b>                             |                       |
| Full psychiatric & autistic spectrum diagnoses           | 7 (24.1)              |
| Full psychiatric diagnosis with autistic features        | 2 (6.9)               |
| Psychiatric diagnosis only                               | 16 (55.1)             |
| Autistic spectrum diagnosis with learning disorder or ID | 2 (6.9)               |
| Autistic spectrum diagnosis with psychiatric features    | 1 (3.5)               |
| Intellectual disability with psychiatric features        | 1 (3.5)               |
